# Supplementary material for: Extremely high-rate capacity and stable cycling of a highly ordered nanostructured carbon–FeF2 battery cathode
Source: Royal Society of Chemistry journal article supplement (doi:10.1039/c5ta06297g), 2015-01-01
Supplement: c5ta06297g1.pdf [file c5ta06297g1.pdf]

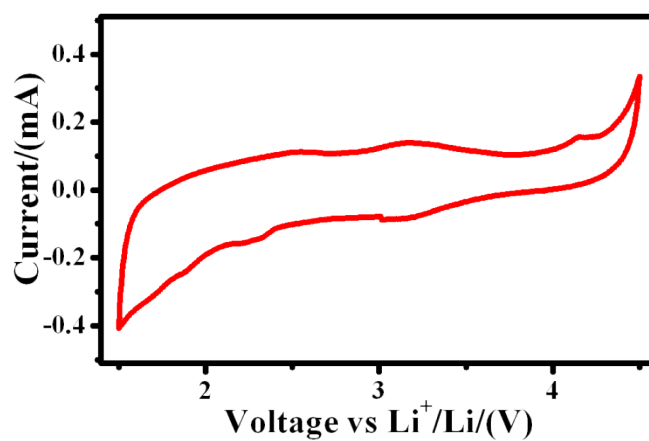

Figure S1 Typical cyclic voltammogram curve for the FeF<sub>2</sub>-CMK-3 hybrid scanning at 0.2 mVs<sup>-1</sup> in a voltage window of 1.5-4.5 V.

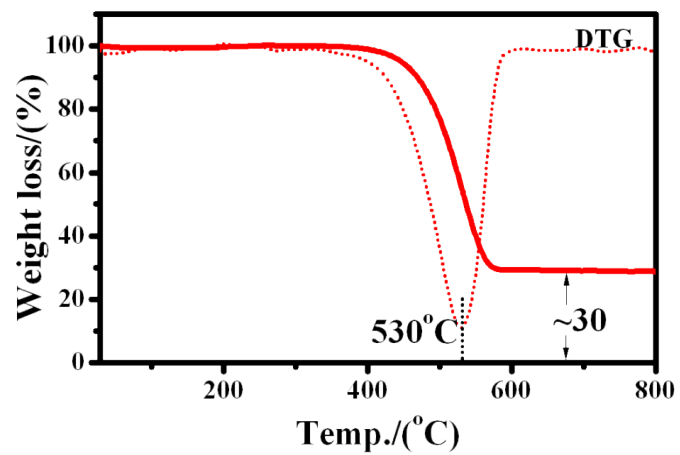

Figure S2 TG curve for the porous FeF<sub>2</sub>-CMK-3 hybrid composite recording at ramp rate of 10 °min<sup>-1</sup> from room temperature to 800 °C.
